# Supplementary figures and images for: Loss of Function of the Retinoblastoma Gene Affects Gap Junctional Intercellular Communication and Cell Fate in Osteoblasts
Source: MDPI journal article supplement (doi:10.3390/biology13010039), 2024-01-11

# Figure 3

Cx43

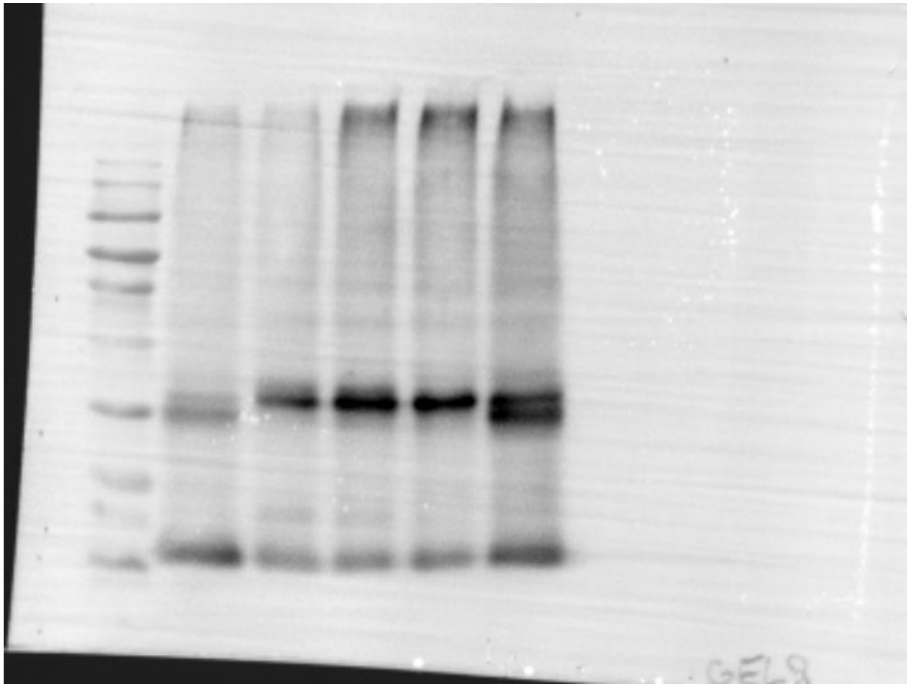

GAPDH

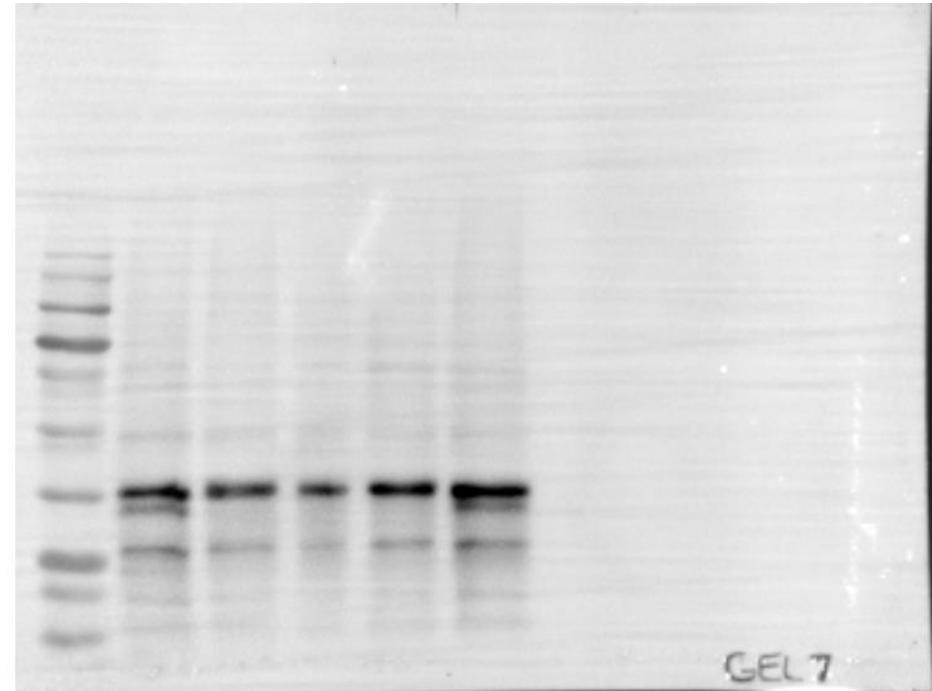

# Figure 5

Cx43

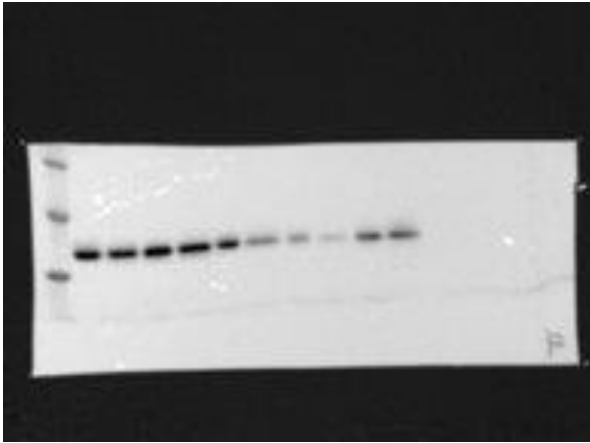

Cad11

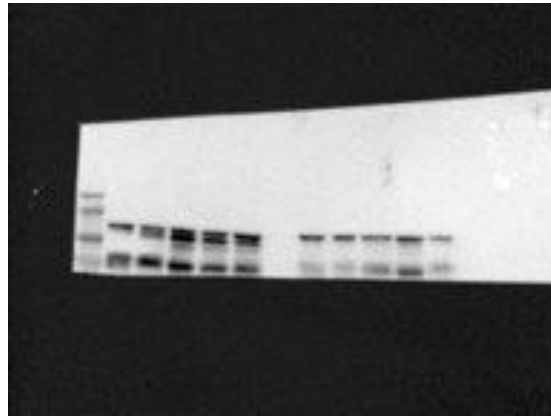

GAPDH

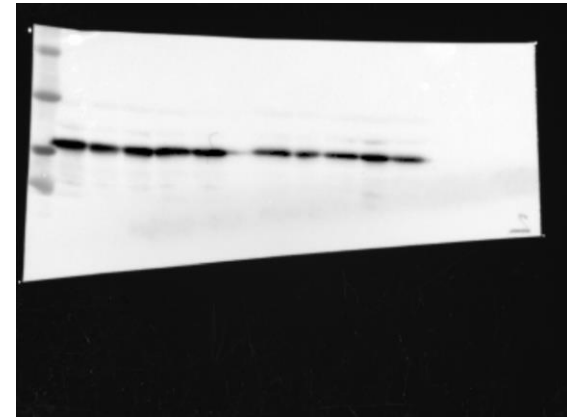

Figure 6A

PPARG

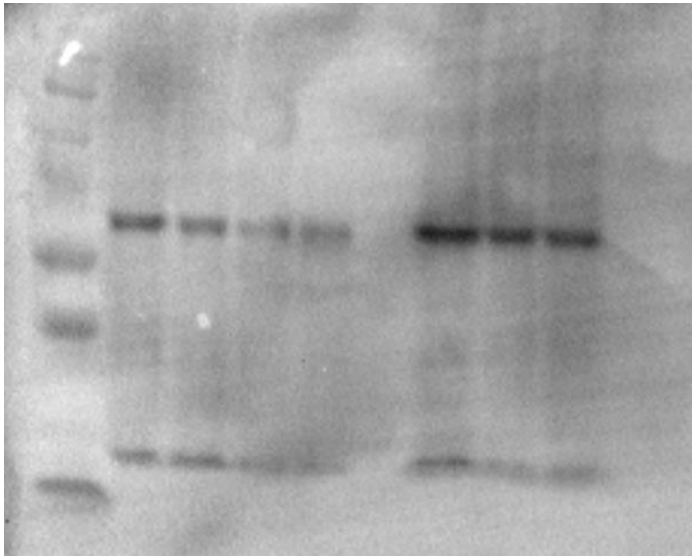

GAPDH

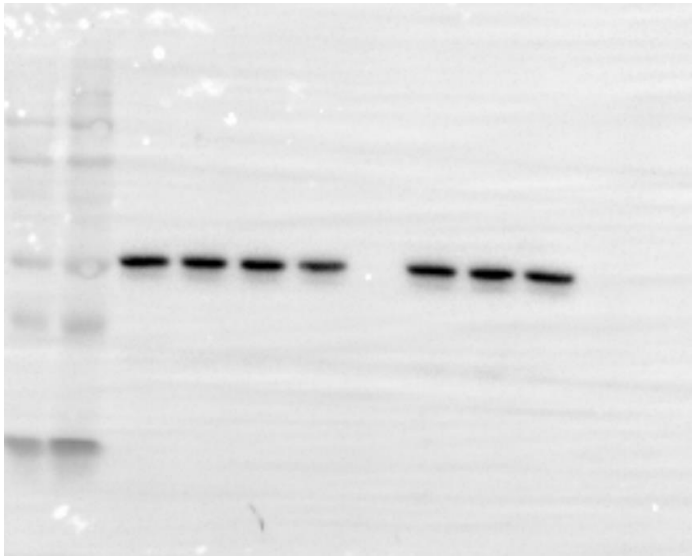

Figure 6C:

CN43

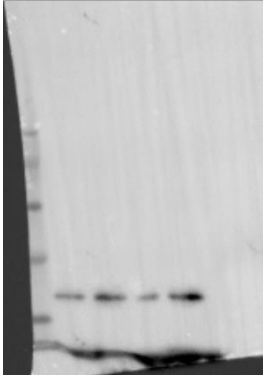

Cad11

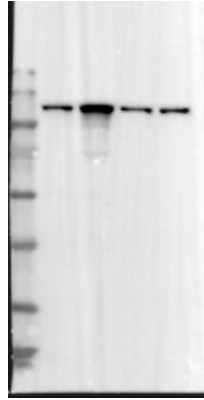

GAPDH

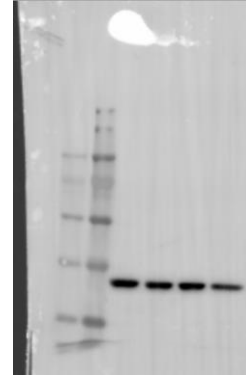

Supplement: s1 [file s1]
